# Supplementary material
Source: PubMed Central journal article supplement (PMC3458378)
Supplement: 1209746109_pnas.201209746SI.pdf [file 1209746109_pnas.201209746SI.pdf]

# Supporting Information

Shu et al. 10.1073/pnas.1209746109

|                                                                                                                                                                                                                                                                 |                                                    |                                                                                                                             |                                                                                           |                                                                       |
|-----------------------------------------------------------------------------------------------------------------------------------------------------------------------------------------------------------------------------------------------------------------|----------------------------------------------------|-----------------------------------------------------------------------------------------------------------------------------|-------------------------------------------------------------------------------------------|-----------------------------------------------------------------------|
| <b>Form 3305</b><br><br>(Rev. June 2010)<br><br>Center for Decision Research                                                                                                                                                                                    |                                                    | <b>Research Study Tax Return</b><br><br>For the period June 1, 2010, through August 30, 2010                                |                                                                                           | Keep a copy of this return for your records.<br><br>OMB No. 1555-0111 |
| <b>Write Clearly</b>                                                                                                                                                                                                                                            | Name                                               |                                                                                                                             | PID                                                                                       |                                                                       |
|                                                                                                                                                                                                                                                                 | Address (Number, street, and room or suite number) |                                                                                                                             | For Administrative Use Only<br><br>T .....<br>FF .....<br>FP .....<br>I .....<br>TL ..... |                                                                       |
|                                                                                                                                                                                                                                                                 | City, State, and ZIP code                          |                                                                                                                             |                                                                                           |                                                                       |
| <b>Part 1</b> Please fill out the questions below to compute your taxed payment.                                                                                                                                                                                |                                                    |                                                                                                                             |                                                                                           |                                                                       |
| 1. Please enter the payment you received on the problem solving task (\$1 per correct matrix you solved in the other room) .....                                                                                                                                |                                                    |                                                                                                                             | 1                                                                                         |                                                                       |
| 2. Tax on payment: Please enter the equivalent of a 20% tax on your payment (i.e., 20 cents for every dollar earned).....                                                                                                                                       |                                                    |                                                                                                                             | 2                                                                                         |                                                                       |
| 3. Please subtract the value specified in box 2 from value specified in box 1 .....                                                                                                                                                                             |                                                    |                                                                                                                             | 3                                                                                         |                                                                       |
| <b>Part 2</b> Participants will be compensated for extra expenses they have incurred in order to participate in this study. In Part 2, you are asked to estimate the costs incurred in order to participate. These costs will be deducted from your tax return. |                                                    |                                                                                                                             |                                                                                           |                                                                       |
| 1. Please estimate the time it took you to come to the lab. You will be compensated \$0.10 per minute, up to a 2 hour maximum .....                                                                                                                             |                                                    |                                                                                                                             | 4                                                                                         |                                                                       |
| 2. Please estimate the cost of your commute, if any, to come to the lab. You will be compensated up to a maximum of \$12 .....                                                                                                                                  |                                                    |                                                                                                                             | 5                                                                                         |                                                                       |
| 3. Please add the value specified in box 4 and the value specified in box 5 .....                                                                                                                                                                               |                                                    |                                                                                                                             | 6                                                                                         |                                                                       |
| <b>Part 3</b> Please compute your final payment.                                                                                                                                                                                                                |                                                    |                                                                                                                             |                                                                                           |                                                                       |
| 1. Please add the value specified in box 3 and the value specified in box 6. This is the amount of your final payment for today's session.....                                                                                                                  |                                                    |                                                                                                                             | 7                                                                                         |                                                                       |
| <b>Sign Here</b>                                                                                                                                                                                                                                                |                                                    | I declare that I carefully examined this return and that to the best of my knowledge and belief it is correct and complete. |                                                                                           |                                                                       |
|                                                                                                                                                                                                                                                                 |                                                    | ▶ _____ ▶                                                                                                                   |                                                                                           |                                                                       |
|                                                                                                                                                                                                                                                                 |                                                    | Signature                                                                                                                   | Date                                                                                      |                                                                       |

Fig. S1. Tax form used in experiment 1, signature-at-the-bottom condition.

|                                                                                                                                                                                                                                                                 |                                                    |                                                                                          |     |                                                                   |
|-----------------------------------------------------------------------------------------------------------------------------------------------------------------------------------------------------------------------------------------------------------------|----------------------------------------------------|------------------------------------------------------------------------------------------|-----|-------------------------------------------------------------------|
| <b>Form 3305</b><br>(Rev. June 2010)<br>Center for Decision Research                                                                                                                                                                                            |                                                    | <b>Research Study Tax Return</b><br>For the period June 1, 2010, through August 30, 2010 |     | Keep a copy of this return for your records.<br>OMB No. 1555-0111 |
| <b>Write Clearly</b>                                                                                                                                                                                                                                            | Name                                               |                                                                                          | PID |                                                                   |
|                                                                                                                                                                                                                                                                 | Address (Number, street, and room or suite number) |                                                                                          |     | T .....                                                           |
|                                                                                                                                                                                                                                                                 | City, State, and ZIP code                          |                                                                                          |     | FF .....                                                          |
|                                                                                                                                                                                                                                                                 |                                                    |                                                                                          |     | FP .....                                                          |
|                                                                                                                                                                                                                                                                 |                                                    |                                                                                          |     | I .....                                                           |
|                                                                                                                                                                                                                                                                 |                                                    |                                                                                          |     | TL .....                                                          |
| <b>Part 1</b> Please fill out the questions below to compute your taxed payment.                                                                                                                                                                                |                                                    |                                                                                          |     |                                                                   |
| 1. Please enter the payment you received on the problem solving task (\$1 per correct matrix you solved in the other room) .....                                                                                                                                |                                                    | 1                                                                                        |     |                                                                   |
| 2. Tax on payment: Please enter the equivalent of a 20% tax on your payment (i.e., 20 cents for every dollar earned).....                                                                                                                                       |                                                    | 2                                                                                        |     |                                                                   |
| 3. Please subtract the value specified in box 2 from value specified in box 1 .....                                                                                                                                                                             |                                                    | 3                                                                                        |     |                                                                   |
| <b>Part 2</b> Participants will be compensated for extra expenses they have incurred in order to participate in this study. In Part 2, you are asked to estimate the costs incurred in order to participate. These costs will be deducted from your tax return. |                                                    |                                                                                          |     |                                                                   |
| 1. Please estimate the time it took you to come to the lab. You will be compensated \$0.10 per minute, up to a 2 hour maximum .....                                                                                                                             |                                                    | 4                                                                                        |     |                                                                   |
| 2. Please estimate the cost of your commute, if any, to come to the lab. You will be compensated up to a maximum of \$12 .....                                                                                                                                  |                                                    | 5                                                                                        |     |                                                                   |
| 3. Please add the value specified in box 4 and the value specified in box 5 .....                                                                                                                                                                               |                                                    | 6                                                                                        |     |                                                                   |
| <b>Part 3</b> Please compute your final payment.                                                                                                                                                                                                                |                                                    |                                                                                          |     |                                                                   |
| 1. Please add the value specified in box 3 and the value specified in box 6. This is the amount of your final payment for today's session.....                                                                                                                  |                                                    | 7                                                                                        |     |                                                                   |

Fig. S2. Tax form used in experiment 1, no-signature (control) condition.

Form **3305**

(Rev. June 2010)

Center for Decision Research

# Research Study Tax Return

For the period June 1, 2010, through August 30, 2010

Keep a copy of this return for your records.

OMB No. 1555-0111

**Sign Here**

I declare that I carefully examined this return and that to the best of my knowledge and belief it is correct and complete.

Signature Date

**Write Clearly**

|                                                    |          |                                |
|----------------------------------------------------|----------|--------------------------------|
| Name                                               | PID      | For Administrative<br>Use Only |
| Address (Number, street, and room or suite number) |          |                                |
| City, State, and ZIP code                          |          |                                |
| T .....                                            | FF ..... | FP .....                       |
| I .....                                            | TL ..... |                                |

**Part 1** Please fill out the questions below to compute your taxed payment.

|                                                                                                                                  |   |  |
|----------------------------------------------------------------------------------------------------------------------------------|---|--|
| 1. Please enter the payment you received on the problem solving task (\$1 per correct matrix you solved in the other room) ..... | 1 |  |
| 2. Tax on payment: Please enter the equivalent of a 20% tax on your payment (i.e., 20 cents for every dollar earned) .....       | 2 |  |
| 3. Please subtract the value specified in box 2 from value specified in box 1 .....                                              | 3 |  |

**Part 2** Participants will be compensated for extra expenses they have incurred in order to participate in this study. In Part 2, you are asked to estimate the costs incurred in order to participate. These costs will be deducted from your tax return.

|                                                                                                                                     |   |  |
|-------------------------------------------------------------------------------------------------------------------------------------|---|--|
| 1. Please estimate the time it took you to come to the lab. You will be compensated \$0.10 per minute, up to a 2 hour maximum ..... | 4 |  |
| 2. Please estimate the cost of your commute, if any, to come to the lab. You will be compensated up to a maximum of \$12 .....      | 5 |  |
| 3. Please add the value specified in box 4 and the value specified in box 5 .....                                                   | 6 |  |

**Part 3** Please compute your final payment.

|                                                                                                                                                 |   |  |
|-------------------------------------------------------------------------------------------------------------------------------------------------|---|--|
| 1. Please add the value specified in box 3 and the value specified in box 6. This is the amount of your final payment for today's session ..... | 7 |  |
|-------------------------------------------------------------------------------------------------------------------------------------------------|---|--|

Fig. S3. Tax form used in experiment 1, signature-at-the-top condition.

Form **3305**

(Rev. June 2010)

Center for Decision Research

# Research Study Tax Return

For the period June 1, 2010, through August 30, 2010

Keep a copy of this return for your records.

OMB No. 1555-0111

**Write Clearly**

Name

PID

For Administrative

Use Only

Address (Number, street, and room or suite number)

T .....

FF .....

FP .....

I .....

TL .....

City, State, and ZIP code

**Part 1**

Please fill out the questions below to compute your taxed payment.

a. Please enter the payment you received on the problem solving task (\$2 per correct matrix you solved in the other room) .....

1

**Part 2**

In Part 2, you are asked to estimate the costs incurred in order to participate. These costs will be deducted from your taxable income.

a. Please estimate the cost of the time it took you to come to the lab. You will be compensated \$0.10 per minute, up to a 2 hour maximum (i.e., \$12 maximum, computed as 120 min X \$0.10 per min) .....

2

b. Please estimate the cost of your commute, if any, to come to the lab. You will be compensated up to a maximum of \$12 .....

3

c. Please add the value specified in box 2 and the value specified in box 3 .....

4

**Part 3**

Please compute your taxable income and your taxes.

a. Please subtract the value specified in box 4 from the value specified in box 1. This is the amount of your taxable income.....

5

b. Please compute your taxes by multiplying the value specified in box 5 by 50% .....

6

**Part 4**

Please compute your final payment.

a. Please subtract the value specified in box 6 from the value specified in box 1. This is the amount of your final payment for today's session.....

7

**Sign Here**

I declare that I carefully examined this return and that to the best of my knowledge and belief it is correct and complete.

▶ \_\_\_\_\_

Signature

▶ \_\_\_\_\_

Date

Fig. S4. Tax form used in experiment 2, signature-at-the-bottom condition.
